# Supplementary material for: Combination of surface imprinting and immobilized template techniques for preparation of core–shell molecularly imprinted polymers based on directly amino-modified Fe3O4nanoparticles for specific recognition of bovine hemoglobin
Source: Royal Society of Chemistry journal article supplement (doi:10.1039/c3tb21684e), 2014-01-01
Supplement: c3tb21684e.pdf [file c3tb21684e.pdf]

Supplementary Information

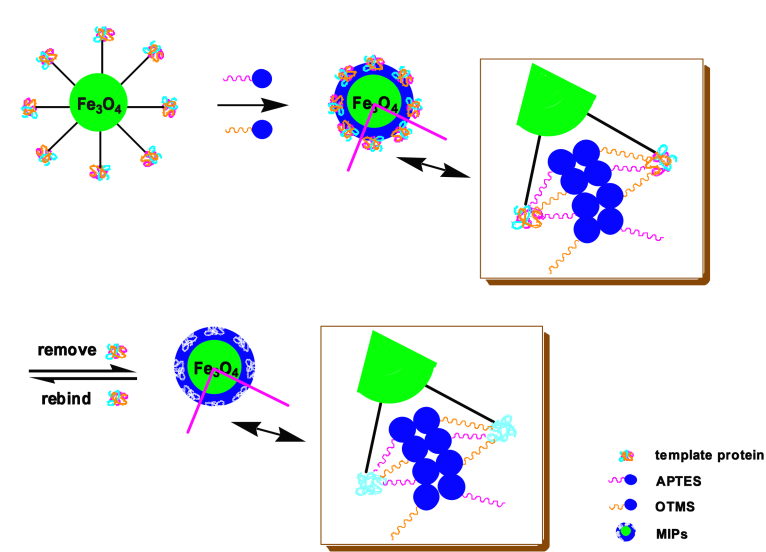

Fig. S1. The diagram of the probable reason of the minor aggregation of the product.
